# Supplementary material
Source: MDPI journal article supplement (https://www.mdpi.com/2073-4344/10/5/532)
Supplement: s1 [file s1]

# Shape-selective mesoscale nanoarchitectures: Preparation and photocatalytic performance

Simona E. Hunyadi Murph<sup>1,2,\*</sup> and Katie Heruox<sup>1</sup>

<sup>1</sup> Environmental, Materials and Energy Directorate, Savannah River National Laboratory, Aiken, SC 29808 USA

<sup>2</sup> Department of Physics and Astronomy, University of Georgia, Athens, GA USA

\* Correspondence: Simona.Murph@srnl.doe.gov, phone: 803-646-6761

Received: date; Accepted: date; Published: date

## Supplemental information

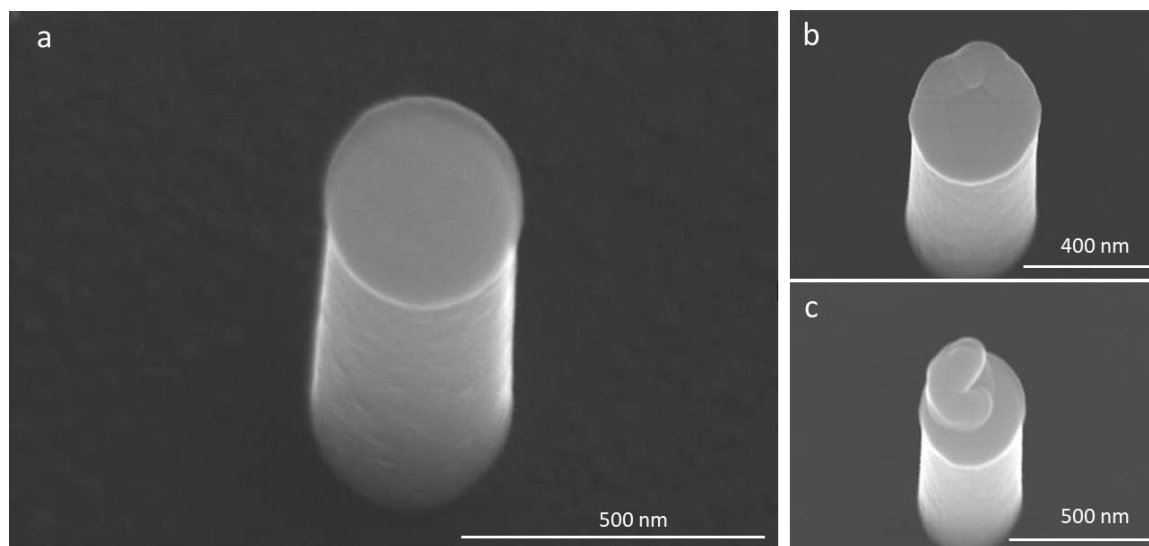

*Figure 1 SI: SEM images of TiO<sub>2</sub>-coated Si post (left) before and (right) after annealing at 500°C for 2 h. The TiO<sub>2</sub>-coated post arrays showed slight degradation in structure near the edges and top surface of the posts.*
